# Supplementary material for: Probiotics for the Treatment of Bacterial Vaginosis: A Meta-Analysis
Source: MDPI journal article supplement (doi:10.3390/ijerph16203859), 2019-10-12

# Original Studies: Efficacy after a normal menstrual cycle (around the 30th day after intervention).

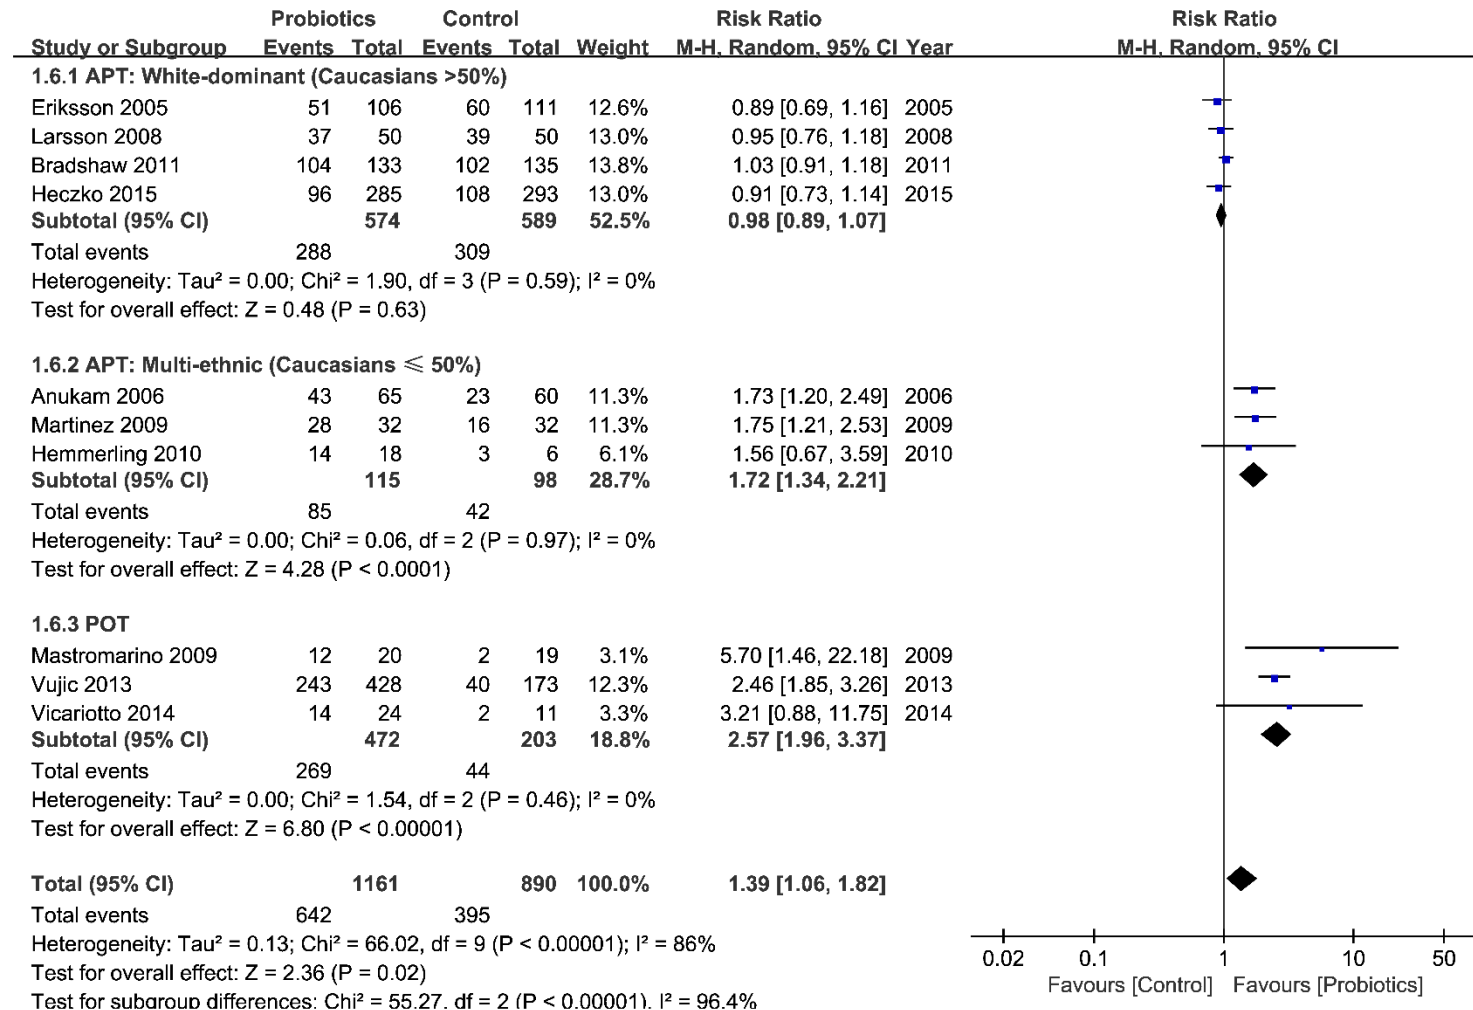

# Add studies with abstract only, around Day 30

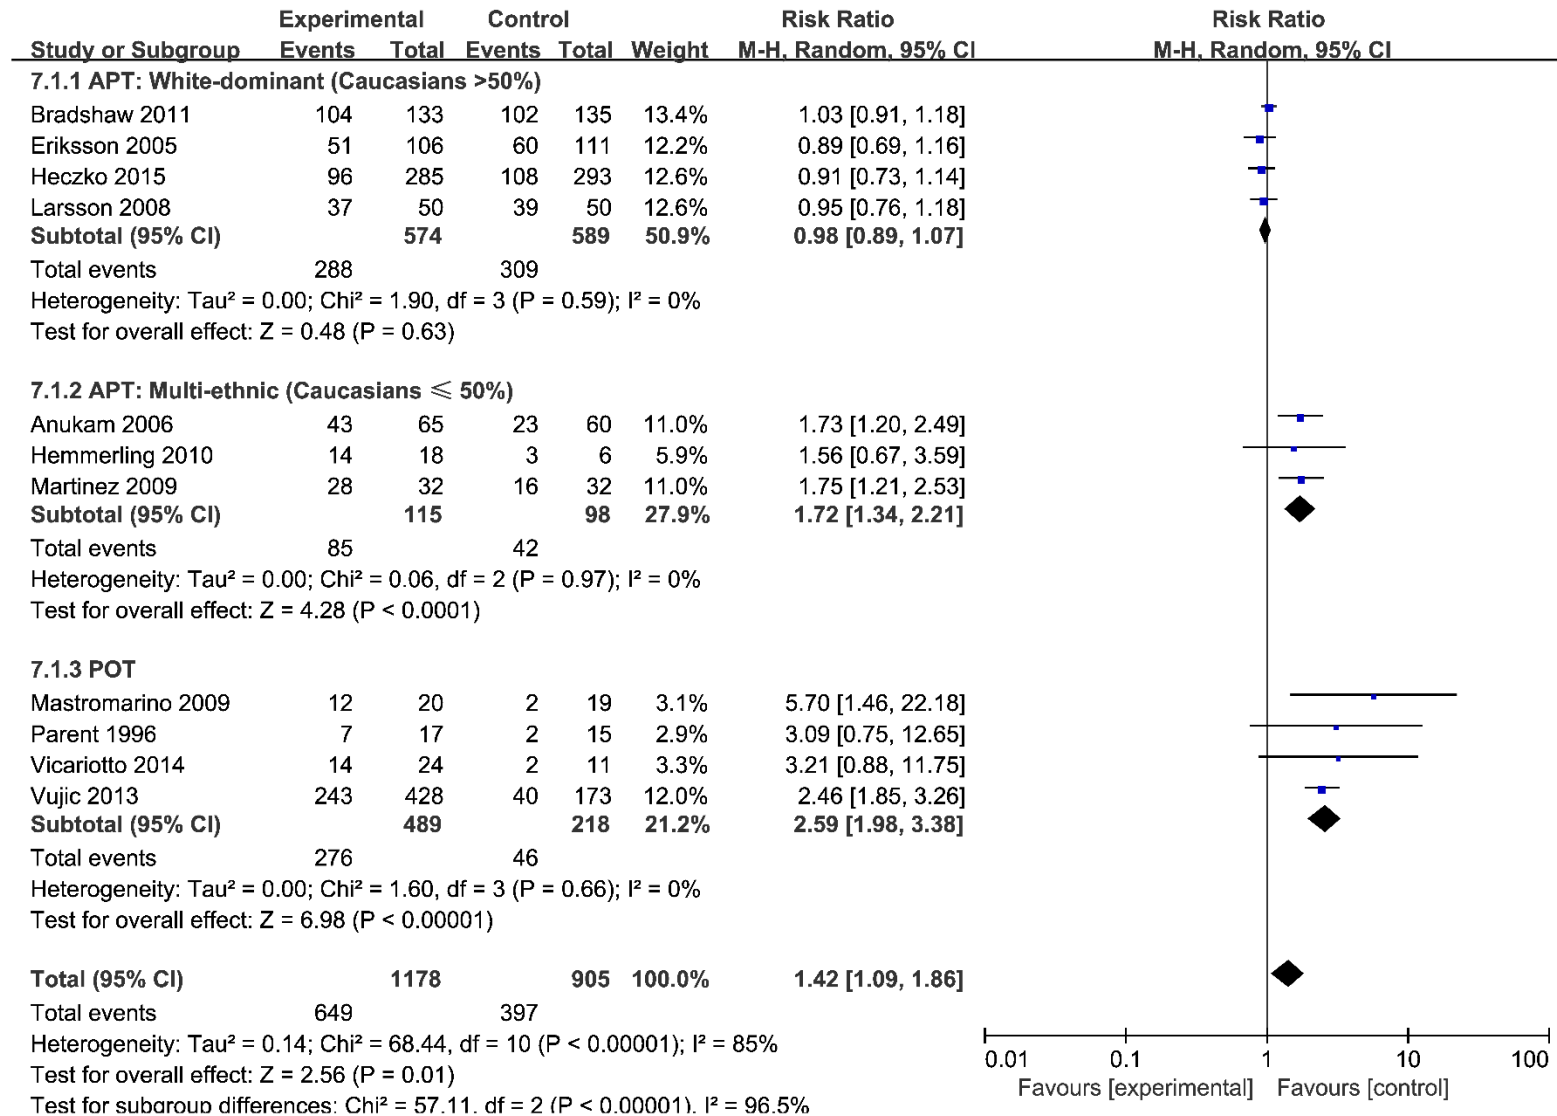

# Add studies with food or dietary supplements, around Day 30

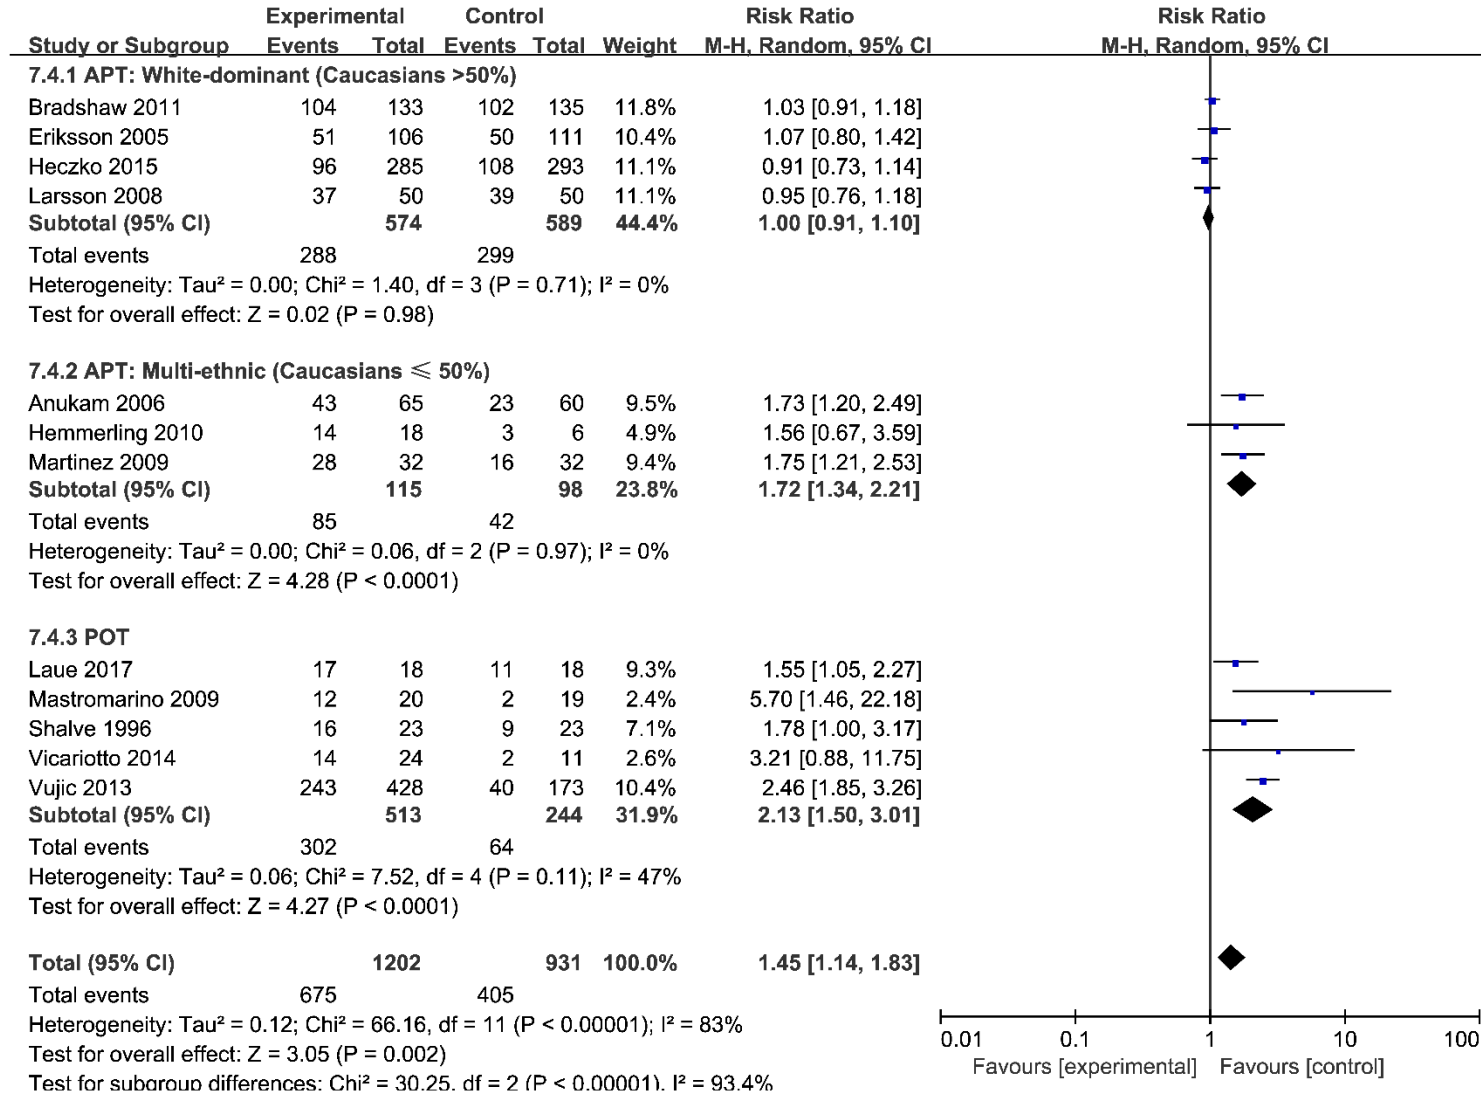

# Add studies with high risk of bias, around Day 30

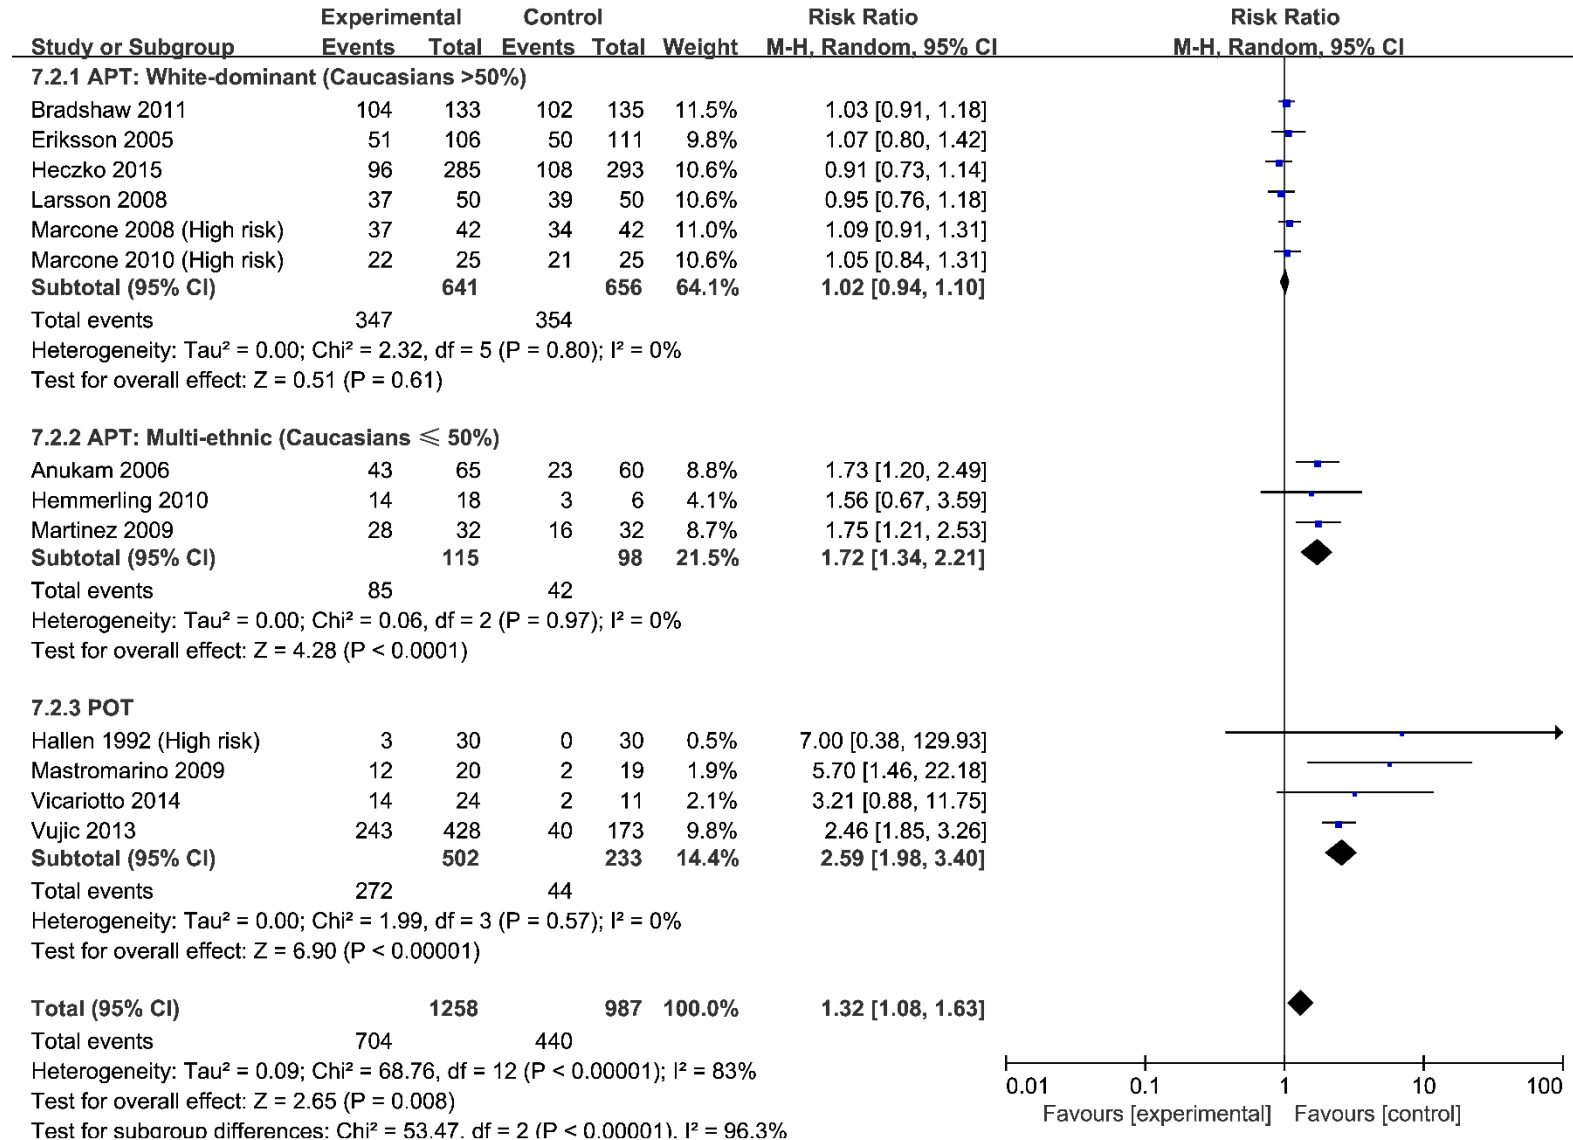

# Add unblinded trials, around Day 30

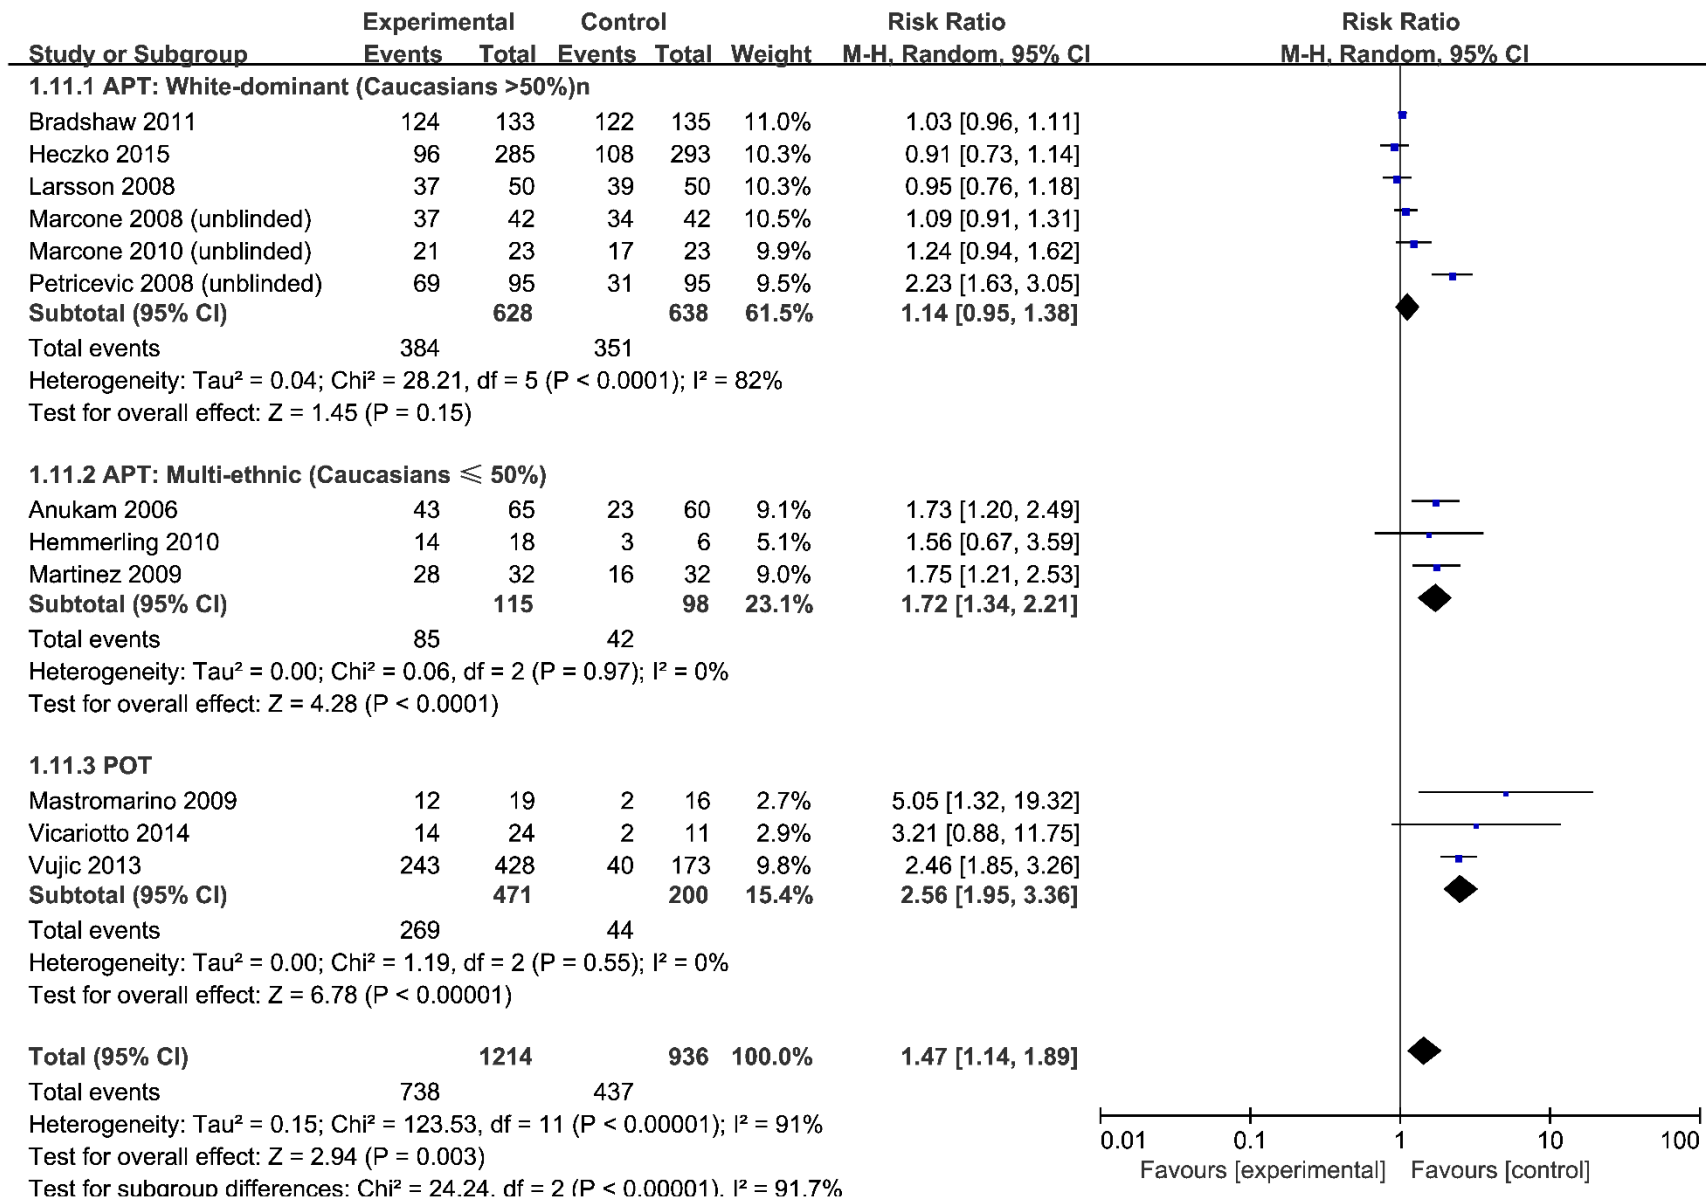

# Add studies with high risk of bias, around Day 60

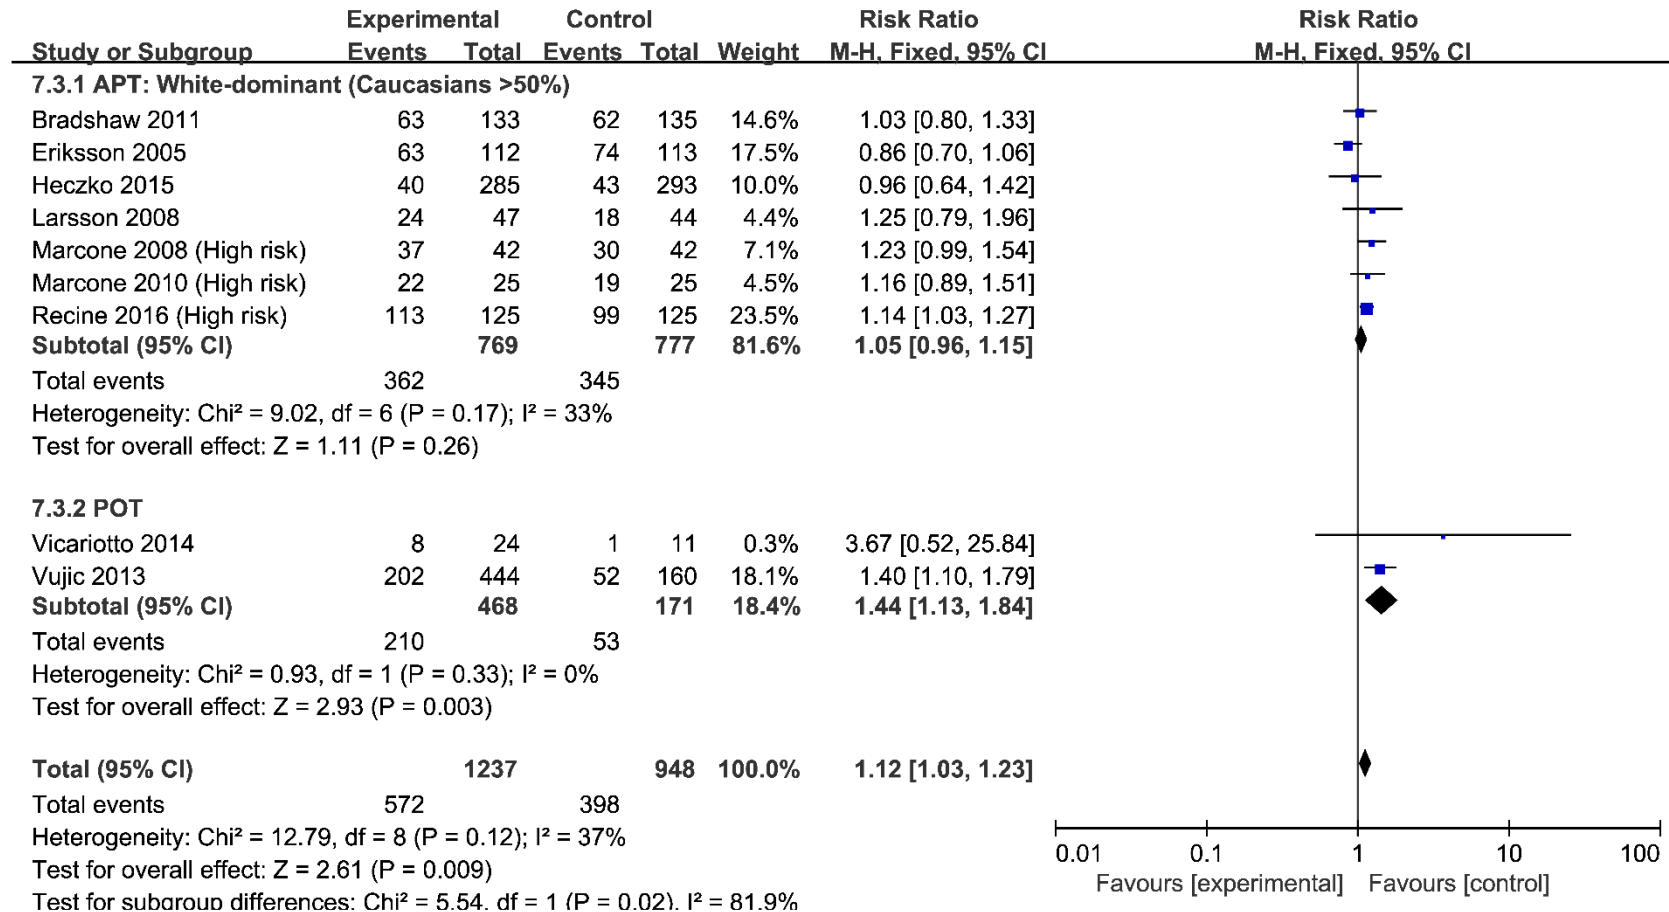

# Add studies less than 20 participants, around Day 60

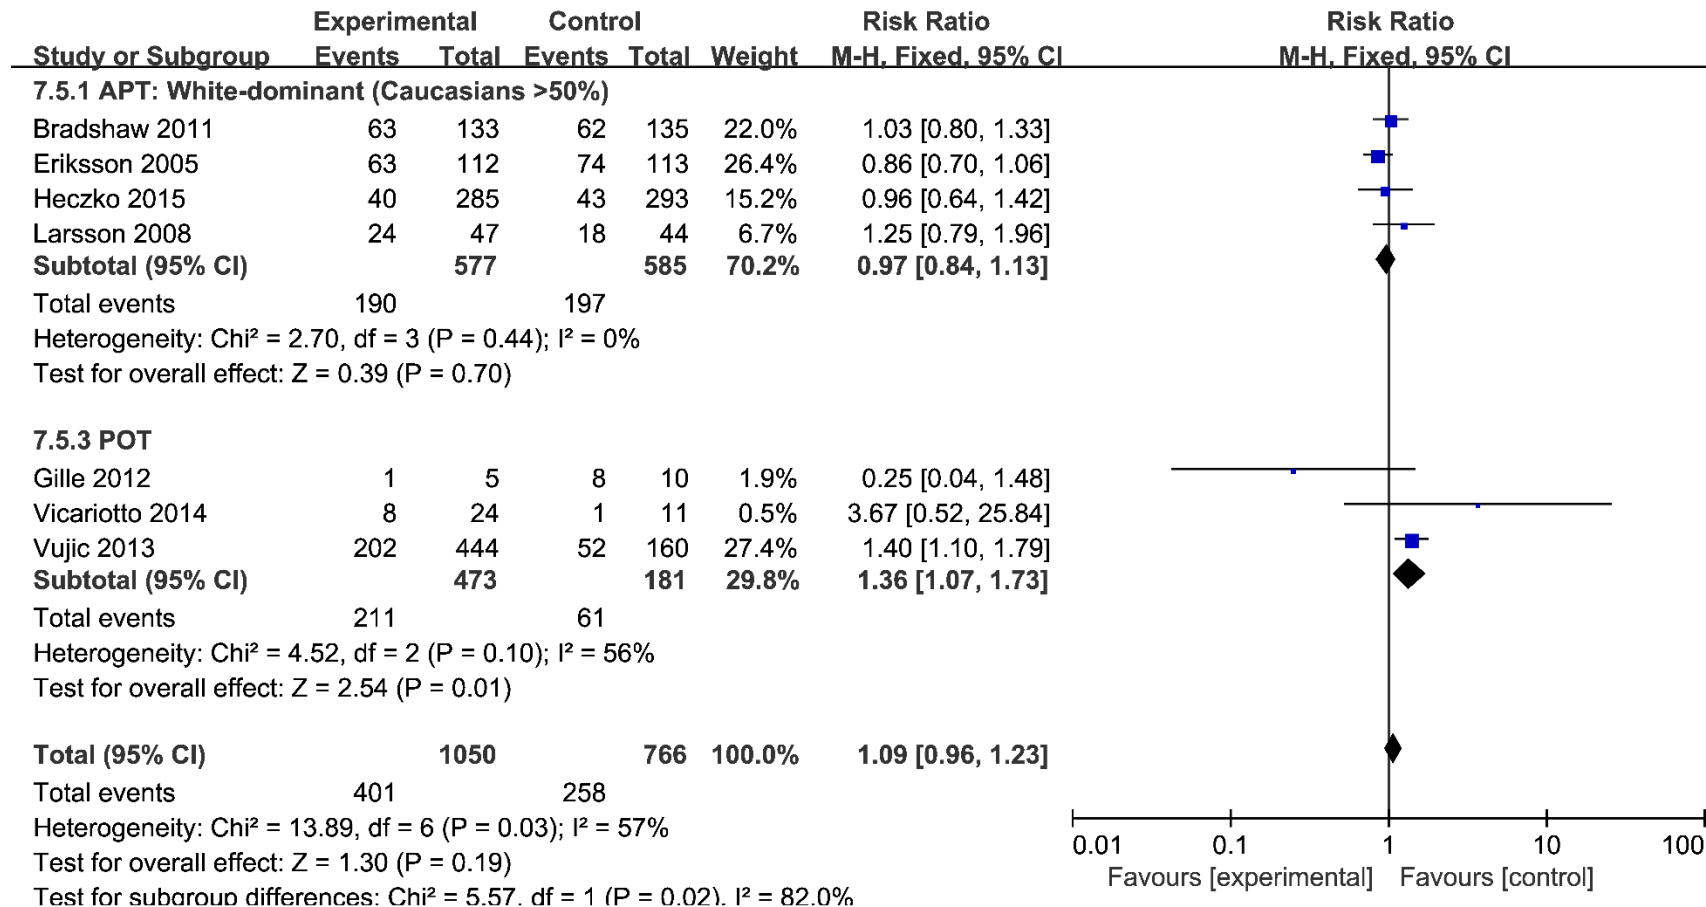

Supplement: s1 [file s1]
